# Supplementary material for: Charge-transfer interactions between fullerenes and a mesoporous tetrathiafulvalene-based metal–organic framework
Source: publisher site journal article supplement (doi:10.3762/bjnano.10.183), 2019-09-18
Supplement: Additional file 1 [file 2190-4286-10-183-S1.pdf]

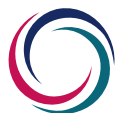

## Supporting Information

for

### **Charge-transfer interactions between fullerenes and a mesoporous tetrathiafulvalene-based metal–organic framework**

Manuel Souto, Joaquín Calbo, Samuel Mañas-Valero, Aron Walsh  
and Guillermo Mínguez Espallargas

*Beilstein J. Nanotechnol.* **2019**, *10*, 1883–1893. doi:10.3762/bjnano.10.183

## Additional figures and tables

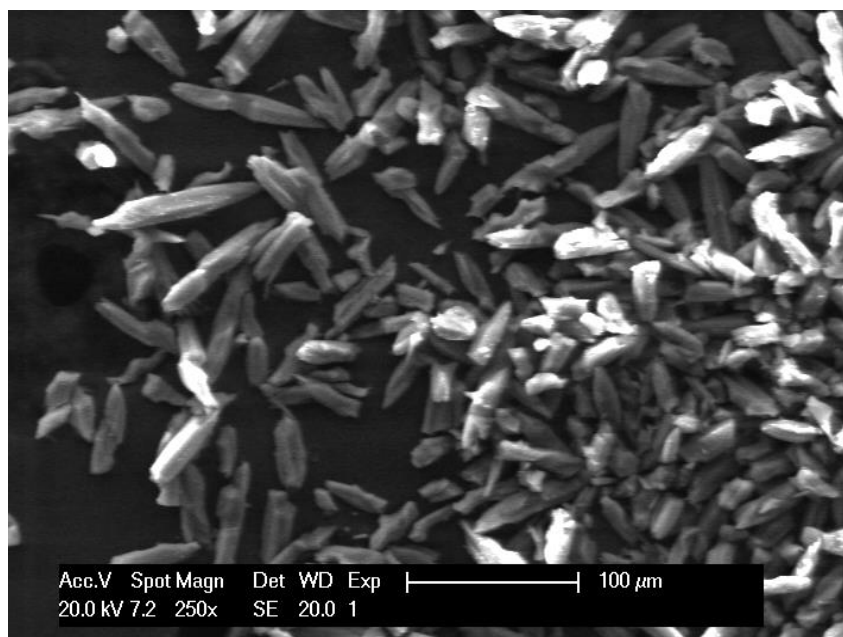

**Figure S1:** SEM image of **C<sub>60</sub>@MUV-2**.

a

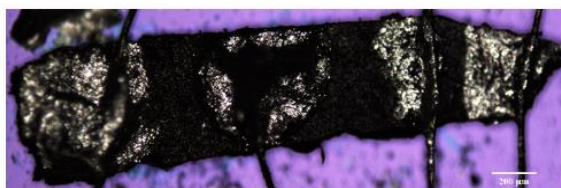

b

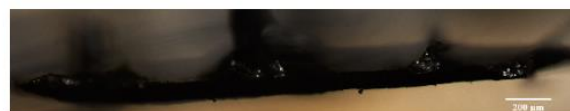

**Figure S2:** Top view (a) and lateral view (b) for **MUV-2** electrical measurements.

a

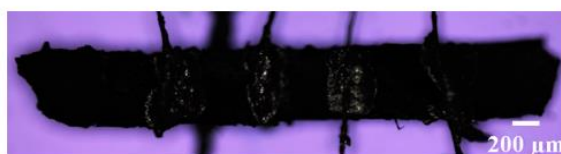

b

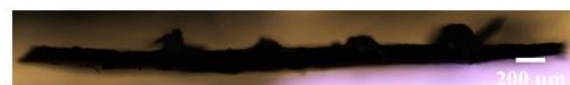

**Figure S3:** Top view (a) and lateral view (b) for **C<sub>60</sub>@MUV-2** electrical measurements.

**Table S1:** Interaction energy (in kcal/mol) of the two conformations A and B of the host-guest **C<sub>60</sub>@MUV-2** complex at the B3LYP level using different basis sets and including or not the counterpoise (CP) correction.

|                | Conformation A |         | Conformation B |         |
|----------------|----------------|---------|----------------|---------|
|                | 6-31G**        | 6-31+G* | 6-31G**        | 6-31+G* |
| <b>No CP</b>   | -23.00         | -22.10  | -26.85         | -24.96  |
| <b>½ CP</b>    | -20.01         | -19.99  | -23.72         | -22.86  |
| <b>Full CP</b> | -17.02         | -17.88  | -20.59         | -20.75  |

**Table S2:** Charge transfer (in electron charge units, e) from the electron-donor TTFTB ligand to the electron-acceptor C<sub>60</sub> guest in the ground state (GS) and the charge-transfer S<sub>1</sub> state (CT) of **C<sub>60</sub>@TTFTB** as a function of the distance between centroids (*d*). Data corresponding to the minimum-energy geometry is in bold.

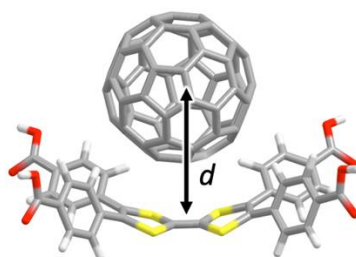

| <i>d</i> (Å) | GS          | CT          |
|--------------|-------------|-------------|
| 6.61         | 0.05        | 0.92        |
| <b>6.86</b>  | <b>0.02</b> | <b>0.94</b> |
| 7.11         | 0.01        | 0.96        |
| 7.36         | 0.00        | 0.97        |
| 7.61         | 0.00        | 0.98        |
| 7.86         | 0.00        | 0.99        |
| 8.11         | 0.00        | 0.99        |

**Table S3:** Intense lowest-lying singlet excited states of TTFTB ligand and C<sub>60</sub> guest, calculated at the CAM-B3LYP/6-31G\*\* level of theory. The energy ( $E$ ), oscillator strength ( $f$ ), major monoexcitation, and description of each state are included.

| State           | $E$ (eV) | $E$ (nm) | $f$    | Monoexcitation  | Description      |
|-----------------|----------|----------|--------|-----------------|------------------|
| TTFTB           |          |          |        |                 |                  |
| S <sub>1</sub>  | 2.907    | 426.4    | 0.0760 | H → L (68%)     | TTF → peripheral |
| S <sub>3</sub>  | 3.486    | 355.7    | 0.1043 | H → L+4 (58%)   | TTF              |
| S <sub>6</sub>  | 4.261    | 291.0    | 0.4840 | H → L+3 (52%)   | TTF → peripheral |
| S <sub>8</sub>  | 4.430    | 279.9    | 0.5490 | H-1 → L+1 (51%) | TTF → peripheral |
| S <sub>21</sub> | 5.217    | 237.7    | 0.4389 | H-3 → L (15%)   | TTF → peripheral |
| S <sub>54</sub> | 6.623    | 187.2    | 0.7300 | H-4 → L+5 (13%) | TTF + peripheral |
| C <sub>60</sub> |          |          |        |                 |                  |
| S <sub>37</sub> | 4.309    | 287.7    | 0.2196 | H-2 → L+3 (18%) | -                |
| S <sub>38</sub> | 4.312    | 287.6    | 0.2196 | H-3 → L+5 (21%) | -                |
| S <sub>39</sub> | 4.315    | 287.3    | 0.2206 | H-4 → L+5 (31%) | -                |
| S <sub>52</sub> | 4.703    | 263.7    | 0.1192 | H-6 → L+2 (19%) | -                |
| S <sub>53</sub> | 4.704    | 263.6    | 0.1181 | H-6 → L+1 (21%) | -                |
| S <sub>54</sub> | 4.706    | 263.5    | 0.1133 | H-8 → L (17%)   | -                |

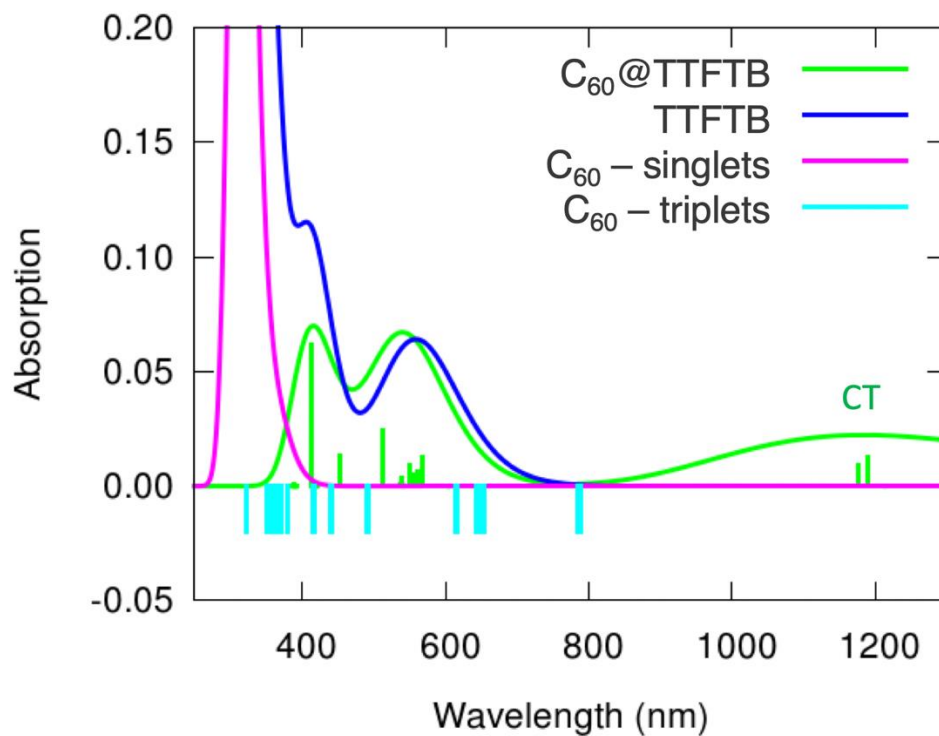

**Figure S4:** TDDFT absorption spectra calculated at the B3LYP/6-31G\*\* for host-guest **C<sub>60</sub>@TTFTB** (including vertical excitation energies), TTFTB ligand, and fullerene C<sub>60</sub> (singlets and triplet energies).

**Table S4:** Evolution of S<sub>1</sub> CT excitation for **C<sub>60</sub>@TTFTB** as a function of distance *d* (as defined in Table S1) and the TTF boat dihedral angle ( $\theta$ ). Data corresponding to the minimum-energy geometry is in bold.

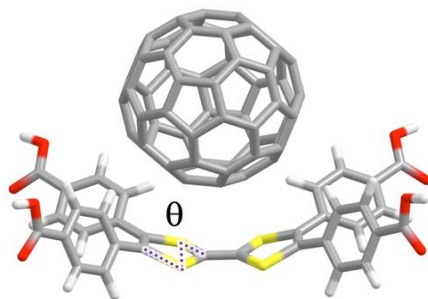

| <i>d</i> (Å) | <i>E</i> (eV) | <i>E</i> (nm) | <i>f</i>      |
|--------------|---------------|---------------|---------------|
| 6.61         | 2.146         | 577.8         | 0.0284        |
| <b>6.86</b>  | <b>2.143</b>  | <b>578.6</b>  | <b>0.0178</b> |
| 7.11         | 2.167         | 572.1         | 0.0103        |
| 7.36         | 2.209         | 561.3         | 0.0054        |
| 7.61         | 2.258         | 549.0         | 0.0027        |
| 7.86         | 2.310         | 536.8         | 0.0012        |
| 8.11         | 2.360         | 525.4         | 0.0005        |
| $\theta$ (°) | <i>E</i> (eV) | <i>E</i> (nm) | <i>f</i>      |
| <b>162</b>   | <b>2.143</b>  | <b>578.6</b>  | <b>0.0178</b> |
| 171          | 2.044         | 606.7         | 0.0131        |
| 180          | 2.025         | 612.3         | 0.0079        |
